# Supplementary material
Source: HighWire-hosted journal article supplement (https://gut.bmj.com/content/67/5/991)
Supplement: inline-supplementary-material-1 [file inline-supplementary-material-1.pdf]

## Supplementary Tables

**Suppl. Table 1:**

Clinicopathological and radiological characteristics of the study cohort (2003-2011).

|                                            |                                |
|--------------------------------------------|--------------------------------|
| <b>Gender</b>                              |                                |
| male                                       | 75 (82%)                       |
| female                                     | 17 (18%)                       |
| <b>Median age (range)</b>                  | 64 (24-84)                     |
| <b>Etiology</b>                            |                                |
| HBV                                        | 4 (4%)                         |
| HCV                                        | 10 (11%)                       |
| co-infection                               | 4 (4%)                         |
| alcohol                                    | 24 (26%)                       |
| NASH                                       | 11 (12%)                       |
| cryptogenic                                | 14 (15%)                       |
| genetic hemochromatosis                    | 2 (2%)                         |
| co-morbidity                               | 5 (5%)                         |
| others                                     | 4 (4%)                         |
| no known liver disease                     | 14 (15%)                       |
| <b>Grading (n=65 HCCs)</b>                 |                                |
| well differentiated HCC                    | 12 (18%)                       |
| moderately differentiated HCC              | 46 (71%)                       |
| poorly differentiated HCC                  | 7 (11%)                        |
| <b>Tumor size (all focal lesions)</b>      |                                |
| <1.0 cm                                    | 0 (0%)                         |
| < 2.0 cm                                   | 15 (16%)                       |
| ≥ 2.0 cm                                   | 79 (84%)                       |
| < 3.0 cm                                   | 32 (34%)                       |
| 2.0 – 5.0 cm                               | 47 (50%)                       |
| > 5.0 cm                                   | 32 (34%)                       |
| <b>Macrovascular invasion (HCCs only)</b>  |                                |
| present                                    | 8 (12%)                        |
| <b>Liver cirrhosis</b>                     |                                |
| present                                    | 60 (64%)                       |
| <b>Imaging modality</b>                    |                                |
| CT                                         | 70 (49%)                       |
| Conventional MRI                           | 28 (20%)                       |
| Gd-EOB-DTPA-MRI                            | 44 (31%)                       |
| <b>Arterial phase</b>                      |                                |
| Early arterial phase                       | 72 (51%)                       |
| Late arterial phase                        | 70 (49%)                       |
| <b>Li-RADS (142 observations)</b>          |                                |
| LR-3                                       | 20 (14%)                       |
| LR-4                                       | 22 (15%)                       |
| LR-5                                       | 72 (51%)                       |
| LR-5V                                      | 13 (9%)                        |
| LR-M                                       | 15 (11%)                       |
| <b>Complication rate</b>                   | 5% (5/99)                      |
| self-limiting small pneumothorax           | 2% (2/99)                      |
| small perihepatic hematoma                 | 1% (1/99)                      |
| self-limiting hematuria                    | 1% (1/99)                      |
| hemorrhagic shock (managed conservatively) | 1% (1/99)                      |
| <b>Biopsy-related 30d mortality</b>        | 0%                             |
| <b>Needle tract seeding</b>                | 0% (as evident from the files) |

**Suppl. Table 2:** False-negative non-invasive HCC diagnosis (For each imaging modality the number of false-negative diagnosis is related to the number of cases analyzed).

| <b>Diagnosis</b> | <b>total</b><br>n= (%) | <b>CT</b><br>n= (%) | <b>Co-MRI</b><br>n= (%) | <b>EOB-DTPA-MRI</b><br>n= (%) | <b>LI-RADS</b>                                 |
|------------------|------------------------|---------------------|-------------------------|-------------------------------|------------------------------------------------|
| No cirrhosis     | 3<br>(14%)             | 2/2<br>(100%)       | 1/2<br>(50%)            | 0/3<br>(0%)                   | LR4 (n=3)                                      |
| Cirrhosis        | 19<br>(86%)            | 10/16<br>(63%)      | 4/4<br>(100%)           | 10/15<br>(67%)                | LR3 (n=7), LR4 (n=3),<br>LR5 (n=7), LR5V (n=2) |

**Suppl. Table 3:** Comparison of LI-RADS and AASLD / EASL-EORTC algorithms

|                                                          | <b>Sensitivity</b> | <b>Specificity</b> | <b>PPV</b> | <b>NPV</b>       | <b>Accuracy</b> |
|----------------------------------------------------------|--------------------|--------------------|------------|------------------|-----------------|
| <b>All imaging series (n=142)</b>                        |                    |                    |            |                  |                 |
| LI-RADS                                                  | 84%                | 48%                | 80%        | 54%              | 74%             |
| AASLD /<br>EASL-EORTC                                    | 74%                | 45%                | 77%        | 40%              | 65%             |
| p-value                                                  | 0.085              | 1.000              | 0.610      | 0.260            | 0.240           |
| <b>CT only (n = 70)</b>                                  |                    |                    |            |                  |                 |
| LI-RADS                                                  | 84%                | 60%                | 84%        | 60%              | 77%             |
| AASLD /<br>EASL-EORTC                                    | 76%                | 45%                | 78%        | 43%              | 67%             |
| p-value                                                  | 0.454              | 0.527              | 0.454      | 0.354            | 0.258           |
| <b>Co-MRI only (n=28)</b>                                |                    |                    |            |                  |                 |
| LI-RADS                                                  | 95%                | 43%                | 83%        | 75%              | 82%             |
| AASLD /<br>EASL-EORTC                                    | 76%                | 71%                | 89%        | 50%              | 75%             |
| p-value                                                  | 0.184              | 0.592              | 0.685      | 0.580            | 0.746           |
| <b>Gd-EOB-DTPA-MRI only (n = 44)</b>                     |                    |                    |            |                  |                 |
| LI-RADS                                                  | 77%                | 31%                | 73%        | 36%              | 64%             |
| AASLD /<br>EASL-EORTC                                    | 68%                | 31%                | 70%        | 29%              | 57%             |
| p-value                                                  | 0.570              | 1.000              | 1.000      | 1.000            | 0.663           |
| <b>Algorithm &amp; Timing</b>                            |                    |                    |            |                  |                 |
| Late arterial imaging<br>(LI-RADS; n=70)                 | 96%                | 50%                | 79%        | 86%              | 80%             |
| Early arterial imaging<br>(AASLD / EASL-<br>EORTC; n=72) | 64%                | 50%                | 82%        | 29%              | 61%             |
| p-value                                                  | <b>&lt;0.001</b>   | 1.000              | 0.803      | <b>&lt;0.001</b> | <b>0.017</b>    |
